# Supplementary material for: Optical Coherence Tomography-Based Choroidal Vascularity Index: Tracking Uveitis Progression Over Time
Source: Research Square preprint supplement (doi:10.21203/rs.3.rs-3840956/v1), 2024-03-14
Supplement: Supplementary file 1 [file 456e8dc402b9a27b00f63e9f.docx]

**Description of Supplementary Material**

This uploaded supplementary material is a single Microsoft Word document (in .docx format) which contains six supplementary tables as referenced in the manuscript.

**Supplementary Table 1: Anatomical Classification of Uveitis**

| **Anatomical Category** | **Number of Patients (n = 49)** |
| --- | --- |
| Anterior | 22 |
| Intermediate | 2 |
| Posterior | 19 |
| Panuveitis | 6 |

**Supplementary Table 2: Aetiological Classification of Uveitis**

| **Aetiological Category** | **Number of Patients (n = 49)** |
| --- | --- |
| Infectious | 18 |
| Non-infectious | 15 |
| Idiopathic | 16 |

**Supplementary Table 3: Specific Aetiology of Uveitis**

| **Specific Aetiology** | **Number of Patients (n = 49)** |
| --- | --- |
| Cytomegalovirus | 2 |
| Fuchs’ Heterochromic Iridocyclitis | 1 |
| HLA-B27 uveitis | 9 |
| Idiopathic | 16 |
| Lightning-induced uveitis | 1 |
| Presumed viral (Progressive outer retinal necrosis) | 1 |
| Primary vitreoretinal lymphoma | 2 |
| Psoriasis | 1 |
| Rheumatoid arthritis | 1 |
| Syphilis | 3 |
| Toxoplasmosis | 1 |
| Tuberculosis | 10 |
| Varicella zoster virus | 1 |

**Supplementary Table 4: CVI and anatomical subtypes of uveitis**

| **Parameters,**  **Mean (95% CI)** | **Anterior**  (N = 22) | **Non-Anterior**  (N = 27) | **Mean Difference**  (Anterior – Non-anterior) | **p-value*** |
| --- | --- | --- | --- | --- |
| 3D Volume CVI (%) | 62.2 [61.2, 63.3] | 61.8 [60.9, 62.8] | 0.4 [-1.0, 1.8] | 0.563 |
| 2D subfoveal CVI (%) | 62.6 [61.4, 63.8] | 62.1 [61.0, 63.2] | 0.5 [-1.2, 2.2] | 0.557 |
| *ANCOVA model, controlling for age and gender | | | | |

**Supplementary Table 5: CVI and aetiological subtypes of uveitis**

| **Parameters,**  **Mean (95% CI)** | **Idiopathic**  (N = 16) | **Infectious**  (N = 18) | **Non-Infectious**  (N = 15) | **p-value*** |
| --- | --- | --- | --- | --- |
| 3D Volume CVI (%) | 62.1 [60.8, 63.4] | 62.0 [60.7,63.2] | 61.9 [60.7, 63.2] | 0.978 |
| 2D subfoveal CVI (%) | 62.5 [61.0, 64.0] | 62.3 [60.8, 63.8] | 62.2 [60.7, 63.7] | 0.955 |
| *ANCOVA model, controlling for age and gender | | | | |

**Supplementary Table 6: Correlation analysis between 2D CVI vs. 3D volume CVI across different settings**

| **Setting** | | **Pearson coefficient** | **p-value** |
| --- | --- | --- | --- |
| All study participants (Control + Uveitis) | Baseline | 0.85 | <0.001 |
| Baseline + 6 months | 0.86 | <0.001 |
| Uveitis | Baseline | 0.84 | <0.001 |
| Baseline + 6 months | 0.86 | <0.001 |
